# Supplementary material
Source: PubMed Central journal article supplement (PMC4116615)
Supplement: NIHMS606333-supplement-Supplemental_methods_and_results.pdf [file NIHMS606333-supplement-Supplemental_methods_and_results.pdf]

## SUPPLEMENTAL MATERIAL

Supplemental Table I. Predictive risk models for thromboembolic complications and bleeding events in patients with atrial fibrillation.

| Risk model                                                           | Scoring                                                                                                                                                                                                                                                                                                                                                                      |
|----------------------------------------------------------------------|------------------------------------------------------------------------------------------------------------------------------------------------------------------------------------------------------------------------------------------------------------------------------------------------------------------------------------------------------------------------------|
| CHADS <sub>2</sub><br>(Gage et al. <sup>1</sup> )                    | <ul style="list-style-type: none"> <li>• Congestive heart failure – 1 point</li> <li>• Hypertension – 1 point</li> <li>• Age ≥75 – 1 point</li> <li>• Diabetes – 1 point</li> <li>• Stroke, previous history – 2 points</li> </ul>                                                                                                                                           |
| CHA <sub>2</sub> DS <sub>2</sub> -VASc<br>(Lip et al. <sup>2</sup> ) | <ul style="list-style-type: none"> <li>• Congestive heart failure – 1 point</li> <li>• Hypertension – 1 point</li> <li>• Age 65-74 – 1 point</li> <li>• Age 75 or older – 2 points</li> <li>• Diabetes – 1 point</li> <li>• Stroke, previous history – 2 points</li> <li>• Female sex – 1 point</li> <li>• Vascular disease, history – 1 point</li> </ul>                    |
| ATRIA<br>(Fang et al. <sup>3</sup> )                                 | <ul style="list-style-type: none"> <li>• Anemia – 3 points</li> <li>• Severe renal disease – 3 points</li> <li>• Age 75+ – 2 points</li> <li>• Prior hemorrhage diagnosis – 1 point</li> <li>• Hypertension history – 1 point</li> </ul>                                                                                                                                     |
| HEMORR <sub>2</sub> HAGES<br>(Gage et al. <sup>4</sup> )             | <ul style="list-style-type: none"> <li>• Hepatic or renal disease – 1 point</li> <li>• Ethanol abuse – 1 point</li> <li>• Malignancy – 1 point</li> <li>• Older age (&gt;75) – 1 point</li> <li>• Reduced platelet count or function – 1 point</li> <li>• Rebleeding risk – 2 points</li> <li>• Hypertension (uncontrolled) – 1 point</li> <li>• Anemia – 1 point</li> </ul> |

|                                                  |                                                                                                                                                                                                                                                                                                                                                                                                              |
|--------------------------------------------------|--------------------------------------------------------------------------------------------------------------------------------------------------------------------------------------------------------------------------------------------------------------------------------------------------------------------------------------------------------------------------------------------------------------|
|                                                  | <ul style="list-style-type: none"> <li>• Genetic factors – 1 point</li> <li>• Excessive fall risk – 1 point</li> <li>• Stroke – 1 point</li> </ul>                                                                                                                                                                                                                                                           |
| <p>HAS-BLED<br/>(Pisters et al.<sup>5</sup>)</p> | <ul style="list-style-type: none"> <li>• Hypertension – 1 point</li> <li>• Abnormal renal function – 1 point</li> <li>• Abnormal liver function – 1 point</li> <li>• Stroke, previous history – 1 point</li> <li>• Bleeding, history of major – 1point</li> <li>• Labile INR – 1 point</li> <li>• Elderly (age 65+) – 1 point</li> <li>• Drug therapy – 1point</li> <li>• Alcohol intake – 1point</li> </ul> |

Supplemental Table II. ICD-9-CM codes used to define comorbidities

| <b>Condition</b>            | <b>ICD-9-CM codes</b>                                                                                                                                                                                                                                                                                                                  |
|-----------------------------|----------------------------------------------------------------------------------------------------------------------------------------------------------------------------------------------------------------------------------------------------------------------------------------------------------------------------------------|
| Heart failure               | 398.91, 402.01, 402.11, 402.91, 404.01, 404.03, 404.11, 404.13, 404.91, 404.93, 425.4x, 425.9x, 428.xx                                                                                                                                                                                                                                 |
| Hypertension                | 401.xx-405.xx                                                                                                                                                                                                                                                                                                                          |
| Diabetes mellitus           | 205.xx                                                                                                                                                                                                                                                                                                                                 |
| Myocardial infarction       | 410.xx, 412.xx                                                                                                                                                                                                                                                                                                                         |
| Kidney disease              | 403.01, 403.11, 403.91, 404.02, 404.03, 404.12, 404.13, 404.92, 404.93, 582.xx, 583.0x-583.7x, 585.xx, 586.xx, 588.0x, V42.0x, V45.1x, V56.xx                                                                                                                                                                                          |
| Liver disease               | 070.22, 070.23, 070.32, 070.33, 070.44, 070.54, 070.6x, 070.9x, 456.0x-456.2x, 570.xx, 571.xx, 572.2x-572.8x, 573.3x, 573.4x, 573.8x, 573.9x, V42.7x                                                                                                                                                                                   |
| Ischemic stroke             | 433.xx-438.xx                                                                                                                                                                                                                                                                                                                          |
| Gastrointestinal bleeding   | 455.2x, 455.5x, 455.8x, 456.0x, 456.20, 530.7x, 530.82, 531.0x, 531.2x, 531.4x, 531.6x, 532.0x, 532.2x, 532.4x, 532.6x, 533.0x, 533.2x, 533.4x, 533.6x, 534.0x, 534.2x, 534.4x, 534.6x, 535.01, 535.11, 535.21, 535.31, 535.41, 535.51, 535.61, 537.83, 562.03, 562.03, 562.12, 562.13, 568.81, 569.3x, 569.85, 578.0x, 578.1x, 578.9x |
| Prior intracranial bleeding | 430.xx-432.xx, 852.xx                                                                                                                                                                                                                                                                                                                  |
| Other bleeding              | 423.0x, 459.0x, 568.81, 593.81, 599.7x, 623.8x, 626.6x, 719.1x, 784.7x, 784.8x, 786.3x                                                                                                                                                                                                                                                 |
| Alcohol abuse               | 265.2x, 291.1x-291.3x, 291.5x-291.9x, 303.0x, 303.9x, 305.0x, 357.5x, 425.5x, 535.3x, 571.0x, 571.1x, 571.2x, 571.3x, 980.xx, V11.3x                                                                                                                                                                                                   |
| Anemia                      | 280.xx-285.xx                                                                                                                                                                                                                                                                                                                          |
| Coagulopathy                | 286.xx, 287.1x, 287.3x-287.5x                                                                                                                                                                                                                                                                                                          |
| Neoplasia                   | 140.xx-172.xx, 174.xx-195.xx, 200.xx-208.xx, 238.6                                                                                                                                                                                                                                                                                     |

Supplemental Table III. Risk ratios (95% confidence intervals) of in-hospital death in current users of dabigatran compared to current users of warfarin admitted with intracranial bleeding, MarketScan databases, 2009-2012. For this analysis, current users were defined as those with an active prescription for oral anticoagulation on admission date and those whose oral anticoagulation prescription ended in the 7-day period before the index hospitalization.

|                           | <b>Warfarin</b> | <b>Dabigatran</b> |
|---------------------------|-----------------|-------------------|
| N                         | 2474            | 104               |
| In-hospital deaths [n(%)] | 560 (22.6)      | 21 (20.2)         |
| Model 1                   | 1 (ref.)        | 0.98 (0.67, 1.43) |
| Model 2                   | 1 (ref.)        | 0.97 (0.66, 1.41) |
| Model 3                   | 1 (ref.)        | 0.97 (0.66, 1.44) |

Model 1: Adjusted for age, sex, and hemorrhage subtype

Model 2: Model 1, additionally adjusted for CHA2DS2-VASC score and ATRIA bleeding score

Model 3: Adjusted for age, sex, hemorrhage subtype, and propensity score deciles

Supplemental Table IV. Risk ratios (95% confidence intervals) of in-hospital death in current users of dabigatran compared to current users of warfarin admitted with intracranial bleeding among those with ≤6 months or ≤1 year since initiation of the anticoagulant regime at the time of index hospitalization, MarketScan databases, 2009-2012.

| <b>6 months</b>           |                 |                   |
|---------------------------|-----------------|-------------------|
|                           | <b>Warfarin</b> | <b>Dabigatran</b> |
| N                         | 327             | 42                |
| In-hospital deaths [n(%)] | 88 (26.9)       | 8 (19.1)          |
| Model 1                   | 1 (ref.)        | 0.76 (0.40, 1.45) |
| Model 2                   | 1 (ref.)        | 0.75 (0.39, 1.43) |
| Model 3                   | 1 (ref.)        | 0.71 (0.37, 1.36) |
| <b>1 year</b>             |                 |                   |
|                           | <b>Warfarin</b> | <b>Dabigatran</b> |
| N                         | 833             | 80                |
| In-hospital deaths [n(%)] | 191 (22.9)      | 13 (16.3)         |
| Model 1                   | 1 (ref.)        | 0.78 (0.47, 1.29) |
| Model 2                   | 1 (ref.)        | 0.76 (0.46, 1.27) |
| Model 3                   | 1 (ref.)        | 0.84 (0.50, 1.39) |

Model 1: Adjusted for age, sex, and hemorrhage subtype

Model 2: Model 1, additionally adjusted for CHA2DS2-VASC score and ATRIA bleeding score

Model 3: Adjusted for age, sex, hemorrhage subtype, and propensity score deciles

Supplemental Table V. Risk ratios (95% confidence intervals) of in-hospital death in current users of dabigatran compared to current users of warfarin admitted with intracranial bleeding restricted to non-traumatic intracranial hemorrhages, MarketScan databases, 2009-2012.

|                           | <b>Warfarin</b> | <b>Dabigatran</b> |
|---------------------------|-----------------|-------------------|
| N                         | 1396            | 56                |
| In-hospital deaths [n(%)] | 389 (27.9)      | 14 (25.0)         |
| Model 1                   | 1 (ref.)        | 0.99 (0.63, 1.55) |
| Model 2                   | 1 (ref.)        | 0.98 (0.63, 1.54) |
| Model 3                   | 1 (ref.)        | 1.00 (0.62, 1.60) |

Model 1: Adjusted for age, sex, and hemorrhage subtype

Model 2: Model 1, additionally adjusted for CHA2DS2-VASC score and ATRIA bleeding score

Model 3: Adjusted for age, sex, hemorrhage subtype, and propensity score deciles

Supplemental Figure I. Flowchart of study patients

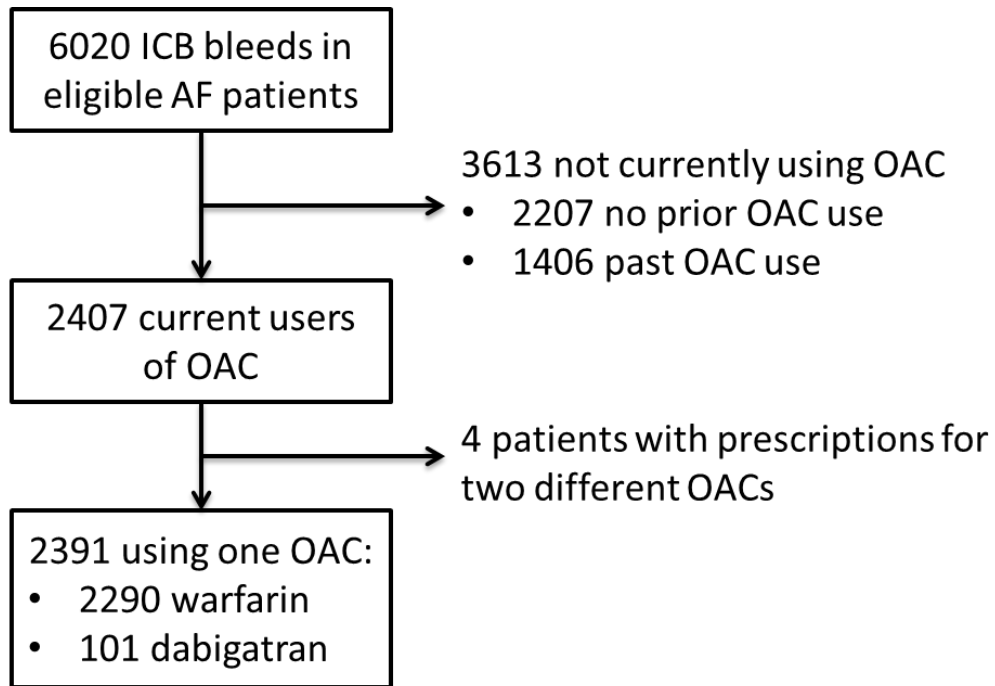

## REFERENCES

1. Gage BF, Waterman AD, Shannon W, Boehler M, Rich MW, Radford MJ. Validation of clinical classification schemes for predicting stroke: results from the National Registry of Atrial Fibrillation. *JAMA*. 2001;285:2864-2870
2. Lip GYH, Nieuwlaat R, Pisters R, Lane DA, Crijns HM. Refining clinical risk stratification for predicting stroke and thromboembolism in atrial fibrillation using a novel risk factor-based approach: The Euro Heart Survey on Atrial Fibrillation. *Chest*. 2010;137:263-272
3. Fang MC, Go AS, Chang Y, Borowsky LH, Pomernacki NK, Udaltsova N, et al. A new risk scheme to predict warfarin-associated hemorrhage: the ATRIA (Anticoagulation and Risk Factors in Atrial Fibrillation) Study. *J Am Coll Cardiol*. 2011;58:395-401
4. Gage BF, Yan Y, Milligan PE, Waterman AD, Culverhouse R, Rich MW, et al. Clinical classification schemes for predicting hemorrhage: results from the National Registry of Atrial Fibrillation (NRAF). *Am Heart J*. 2006;151:713-719
5. Pisters R, Lane DA, Nieuwlaat R, de Vos CB, Crijns HJGM, Lip GYH. A novel user-friendly score (HAS-BLED) to assess 1-year risk of major bleeding in patients with atrial fibrillation: The Euro Heart Survey. *Chest*. 2010;138:1093-1100
